# The stasis that wasn't: Adaptive body mass evolution is opposite to phenotypic selection in a wild rodent population

Bonnet Timothée<sup>1,\*</sup>, Wandeler Peter<sup>1,2</sup>, Camenisch Glauco<sup>1</sup>, Postma Erik<sup>1</sup>

**1 Department of Evolutionary Biology and Environmental Studies,  
University of Zurich, Zurich, Switzerland**

**2 Natural History Museum Fribourg, Fribourg, Switzerland**

\* [timothee.bonnet@ieu.uzh.ch](mailto:timothee.bonnet@ieu.uzh.ch)

## Abstract

Despite being heritable and under selection, traits often do not appear to evolve as predicted by evolutionary theory. Indeed, conclusive evidence for contemporary adaptive evolution remains elusive in wild vertebrate populations, and stasis seems to be the norm. This so-called stasis paradox highlights our inability when it comes to predicting evolutionary change. This is especially concerning in the context of rapid anthropogenic environmental changes, and its underlying causes are therefore hotly debated. Applying a quantitative genetic framework to data from the long-term monitoring of a wild rodent population, we here show that stasis is an illusion. Indeed, the population has evolved to become lighter, and this genetic change is an adaptive response related to climate. Importantly however, both this evolutionary change and the selective pressures driving it are not apparent on the phenotypic level. We thereby demonstrate that natural populations can show a rapid and adaptive evolutionary response in response to novel selective pressures, but that these may easily go undetected and may not match phenotypic estimates of selection. Hence, evolutionary stasis is likely to be less common than it appears.

# Introduction

Given the rapid anthropogenic environmental changes experienced by organisms around the world, there is an increasing need for the ability to predict the evolutionary dynamics of wild populations [1]. However, predictive models of evolution have so far largely failed when applied to data from wild populations [2] and conclusive evidence for contemporary adaptive evolution, in particular to climate, remains elusive in wild vertebrate populations [3,4]. For example, natural and sexual selection almost universally favour larger individuals [5], and body size typically is highly heritable [6,7]. Nevertheless, while species tend to get larger over geological timescales [8,9], conclusive evidence for a contemporary evolutionary response to selection remains elusive for wild animal populations—for body size [10] or any other fitness-related quantitative trait for that matter [2,4]. This mismatch between the predicted and the observed response, also referred to as the ‘stasis paradox’ [2], and our inability to predict the evolutionary dynamics of wild populations in general, is a major concern that is in urgent need of a resolution.

Although studies that find a discrepancy between the observed and predicted rate of evolution are plentiful, they typically have two limitations: First, their predictions rely on the breeder’s equation, which assumes that phenotypic selection, quantified as the covariance between a trait and relative fitness, is causal [11]; Second, they typically compare this prediction either to the trend in mean phenotype over time [2], or to flawed estimates of genetic change based on estimated breeding values [12,13] (but see [11,14,15]). Although [15] provided the first example of quantitative trait evolution in a wild vertebrate population, this was in response to size-selective trophy hunting, and so far there are no statistically rigorous examples of an evolutionary response to natural selective pressures, in particular not to climate [4]. Here we apply a comprehensive analytical framework to long-term individual-based data from a wild rodent population, in order to directly quantify selection and evolution of body mass. This allows us to compare the observed genetic change to a range of evolutionary predictions, and to unravel the causes underlying the stasis paradox.

## Results and discussion

Based on nine years of data on an alpine population of snow voles [16,17] (*Chionomys nivalis*, Martin 1842), we find that relatively heavy individuals both survive better ( $p = 0.04$ ) and produce more offspring per year ( $p = 0.003$ ). This generates strong phenotypic selection favouring heavier individuals (selection differential  $S = 0.86$  g,  $p < 10^{-5}$ ). In line with other morphological traits [6,7], variation in body mass has a significant additive genetic component ( $V_A = 4.34$  g<sup>2</sup>, 95%CI [2.40;7.36]), which corresponds to a heritability ( $h^2$ ) of 0.21. Similarly, we find significant additive genetic variance in fitness ( $V_A = 0.10$ ; 95%CI [0.06;0.19],  $h^2 = 0.06$ ), measured as relative lifetime reproductive success (rLRS).

Given the observed selection differential ( $S$ ) and heritability ( $h^2$ ), the breeder's equation ( $R = h^2 S$ ) predicts an adaptive evolutionary response ( $R$ ) in body mass [11,18], i.e. an increase in the mean breeding value for body mass over time, of 0.22 g/year (Fig 2A UBE). However, after correcting for demographic structure (i.e. sex and age, see Fig. S1), over the past nine years (approximately eight generations), the change in mean body mass is not significant and small at best (0.08 g/y; 95%CI [-0.02;0.18];  $p = 0.14$ ). This mismatch between the predicted evolutionary change based on the breeder's equation and the change observed provides yet another example of the stasis paradox [2].

In an attempt to resolve this paradox, several explanations have been put forward. For example, it has been suggested that the predicted positive genetic trend, i.e. an increase in breeding values, is being masked by an opposing phenotypically plastic response [2,19]. We therefore directly estimated the additive genetic covariance between mass and fitness, which, based on the Robertson-Price's equation, provides an unbiased estimate of the rate of genetic change per generation [11,20,21]. The estimate of genetic change in mass is strongly negative and highly significant ( $p_{\text{MCMC}} < 0.001$ ; Fig. 2A GCPE), and when normalized by a mean generation time of 1.2 years, provides a rate of evolutionary change of -0.29 g/year (95%CI [-0.55; -0.07]). Importantly, this amount of change is unlikely to have happened solely through genetic drift ( $p_{\text{MCMC}} < 0.001$ ; Fig. S2) [13], and therefore most likely reflects a response to selection favouring genetically lighter individuals.

This result was confirmed by an independent, less powerful, calculation using best linear unbiased predictors (BLUPs) of breeding values for mass : taking into account the non-independence of BLUPs and sampling variance [12,13], we find that predicted breeding values have declined over the past nine years (-0.07 g/year,  $p_{\text{MCMC}}=0.06$ ; Fig. 1B & Fig. 2A TPBV), and this despite the BLUPs approach being potentially biased [12].

As the phenotypic selection differential ( $\sigma_{P(m,\omega)}$ ) is equal to the sum of the additive genetic and environmental covariances between mass and rLRS ( $\sigma_{A(m,\omega)}$  and  $\sigma_{E(m,\omega)}$ , respectively) [11,20,21], it follows that because  $\sigma_{P(m,\omega)}$  is positive and  $\sigma_{A(m,\omega)}$  is negative, the environmental covariance must be large and positive (Fig 2B LRS). In other words, while environmental conditions that make voles heavy (for instance abundance of food or lack of parasites) also make them successful at reproducing and surviving, there is no causal positive relationship between breeding values for mass and fitness. The difference of sign between  $\sigma_{A(m,\omega)}$  and  $\sigma_{E(m,\omega)}$  is an extreme violation of an assumption of evolutionary predictions based on the breeder's equation (i.e.  $\sigma_{A(m,\omega)}/(\sigma_{A(m,\omega)} + \sigma_{E(m,\omega)}) = h^2$ ). This clarifies why our first prediction of evolution was wrong, and demonstrates that phenotypic estimates of selection may provide severely biased predictions of the evolutionary trajectories of wild populations. However, why is evolution taking place in a direction that is opposite to phenotypic selection?

The genetic change of mass opposite to direct selection may be the result of indirect selection acting through one or more traits with negative genetic correlations with mass (Fig. 3) [22,23]. However, the genetic correlations among the three morphological traits for which we have data—body mass ( $m$ ), body length ( $b$ ) and tail length ( $t$ )—are all positive (estimates and 95%CI:  $\rho_{m,b} = 0.79$  [0.06;0.93];  $\rho_{m,t} = 0.40$  [0.01;0.66];  $\rho_{t,b} = 0.56$  [-0.04;0.85]), and the predicted response based on the multivariate breeder's equation (Fig. 2A MBE) is very similar to that based on its univariate counterpart (Fig. 2A UBE), as well as to that based on a multivariate breeder's equation constraining the correlations to zero (Fig. 2A MBE $_{\rho=0}$ ). So, although we cannot exclude that selection on other, unmeasured, traits does indirectly shape body mass evolution, there is no evidence for genetic correlations generating the striking mismatch between observed and predicted genetic change. This suggests that the counter-intuitive direction of evolution is really due to selective pressures acting on mass, but given that selection acts on

phenotypes rather than genotypes, which aspect of mass is this?

In order to identify which aspect of an individual's body mass is the subject of negative selection, we computed sex- and age-specific genetic covariances between mass and fitness components, allowing us to identify what fitness component is negatively associated with genes for being heavy. Whereas the genetic covariances between mass and both relative annual reproductive success and adult survival are close to zero in both sexes (Fig. 2B), the genetic covariance between mass and over-winter survival probability is negative in juveniles (-0.98 [-2.44;-0.18] on a logit scale,  $p_{\text{MCMC}}=0.01$ ). Because the genetic correlation between juvenile and adult mass is positive ( $r_A = 0.88$ ; 95%CI [0.39;1]) and significantly different from 0 ( $p=0.004$ ) but not 1 ( $p=0.35$ ), selection on juvenile mass can shape genetic variance for mass at all ages, and thereby contribute to the observed negative genetic change [24]. While this shows that negative viability selection of juvenile mass is responsible for the genetic change toward smaller individuals, how come survival is higher for heavier phenotypes *and* lighter genotypes?

Juvenile mass covaries positively with both within- and between-year survival ( $p = 0.009$  and  $p = 1.3 \times 10^{-6}$ , respectively). However, juveniles can only be captured when they first leave their burrow, at an age of approximately three weeks [25] and a weight of 12 to 20 g, and they may continue to be captured until the end of the season, when they can reach weights of up to 50 g. Because of growth, mass measurements are therefore not directly comparable among juveniles. Indeed, at least part of the positive phenotypic selection on juvenile mass is likely to be mediated by age-related variation in both mass and in the probability of survival to the next year [26]. In addition, viability selection introduces non-random missing data, which results in biased estimates of viability selection on mass [26,27].

To obtain an estimate of viability selection that is unbiased by growth and non-random missing data due to mass-dependent mortality occurring after the first capture [26], we used a Bayesian model to simultaneously infer birth dates and growth curves for all juveniles observed at least once, irrespective of when and how often they have been captured. Although we cannot account for viability selection acting before the first capture, this enabled us to quantify viability selection on age-corrected juvenile mass—i.e. asymptotic mass, or the adult mass as estimated from the growth curve—, and thereby compare all individuals at the same developmental stage, irrespective of

their fate.

Inferred birth dates revealed that snow fallen during the preceding winter is a major ecological factor constraining the onset of reproduction in spring, with reproduction starting on average 40 days after the snow has melted (SE 4.5,  $p = 4 \times 10^{-5}$ ) (Fig. 4A). As a consequence, juveniles only have a limited amount of time to grow and reach their adult mass before the return of winter. Assuming growth rate and adult mass are uncorrelated, juveniles with a smaller adult mass will on average require less time to complete development. If individuals that have not completed development before the arrival of winter pay a survival cost, for example due to trade-offs between growth and vital physiological processes [28,29], this generates selection for small size, especially for juveniles born toward the end of the season (Fig. 4D).

This suggests that the trait under selection is adult mass, but in juveniles. To test this hypothesis, we quantified the strength of survival selection acting on asymptotic mass in juveniles, which was slightly negative when averaged over all years and the complete reproductive season ( $p_{\text{MCMC}}=0.13$ ), but interacted strongly and significantly with the number of days between birth and the first snowfall of that year ( $p_{\text{MCMC}}=0.008$ ). This implies that individuals born closer to the first snowfall are more strongly selected for a small adult mass, and that the length of the snow-free period in a given year determines the total selection experienced by the population in that year.

Interestingly, the length of the snow-free period in the years 2008 to 2014 has been significantly shorter than during the preceding six years (Fig. 4B). Our model estimates that in 2006 and 2007, when the snow-free period was long (Fig. 4B), most juveniles reached their adult mass before the first snowfall, and there was hence no selection on asymptotic mass ( $\beta = -0.002$ , SE= 0.0006,  $p_{\text{MCMC}}=0.47$ , Fig. 4C; D; S3). However, in all subsequent years, the snow-free period was much shorter, and there was selection for a smaller asymptotic mass ( $\beta = -0.10$ , SE=0.0008,  $p_{\text{MCMC}}=0.009$ ). This suggests that the shortening of the snow-free season, and thereby selection for smaller asymptotic mass, is a novel phenomenon that the population is currently in the process of adapting to. Although model complexity and data availability prohibit disentangling genetic and environmental sources of variation in asymptotic mass among individuals and over time, the cohort born in 2013 had an estimated adult mass that was 1.02 g smaller than the cohort born in 2006 ( $p=0.049$ ). This decrease is predicted to increase population-level

juvenile survival by 2.5%. 156

On the whole, we have shown that while cases of evolutionary stasis appear to be 157  
commonplace, these may be attributable to overly simplistic predictions of evolutionary 158  
change based on estimates of phenotypic selection that fail to account for 1) a 159  
disproportional environmental covariance between trait and fitness, and 2) non-random 160  
missing data whenever viability selection acts during ontogeny. Therefore, the 161  
quantification, and most importantly, the prediction of evolution in the wild requires 162  
the direct estimation of more complex patterns of inheritance, genetic correlations and 163  
selective pressures. 164

## Methods 165

**Snow vole monitoring.** Monitoring of the snow vole population began in 2006 and 166  
the present work uses data collected until the fall of 2014. The snow vole monitoring 167  
was authorised by the *Amt für Lebensmittelsicherheit und Tiergesundheit*, Chur, 168  
Switzerland. The study site is located at around 2030m above sea level, in the central 169  
eastern Alps near Churwalden, Switzerland (46°48' N, 9°34' E). It consists of scree, 170  
interspersed with patches of alpine meadows and surrounded by habitat unsuitable for 171  
snow voles: a spruce forest to the West, a cliff to the East and large meadows to the 172  
North and South. In accordance with it being considered a rock-dwelling specialist [25], 173  
at our study site it is almost never captured outside of the rocky area. Given that it is 174  
ecologically fairly isolated, we are able to monitor the whole population. Trapping 175  
throughout the whole study area takes place during the snow-free period, between late 176  
May and mid-October. One trapping session consists of four trapping nights. Analyses 177  
presented here are based on a total of two (in one year), three (in three years) or five (in 178  
five years) trapping sessions per season. All newly-captured individuals weighing more 179  
than 14 g are marked with a subcutaneous passive transponder (PIT, ISO transponder, 180  
Tierchip Dasmann, Tecklenburg). Additionally, an ear tissue sample is taken (maximum 181  
2 mm in diameter) using a thumb type punch (Harvard Apparatus) and stored in 100% 182  
ethanol at -20°C. DNA extracted from these samples was genotyped for 18 autosomal 183  
microsatellites developed for this population [30], as well as for the *Sry* locus to confirm 184  
the sex of all individuals. Finally, another Y-linked marker as well as a mitochondrial 185

marker were used check for errors in the inferred pedigree (see below). An identity analysis in **CERVUS** v.3.0 [31] allowed us to identify animals sampled multiply, either because they lost their PIT, or because at their first capture as a juvenile they were too small to receive a PIT. All the analyses were carried out in R [32]. Specific packages are referenced below.

**Pedigree inference.** Parentage was inferred by simultaneously reconstructing paternity, maternity and sibship using a maximum likelihood model in **MasterBayes** [33]. Parentage was assigned using a parental pool of all adults present in the examined year and the previous year, assuming polygamy and a uniform genotyping error rate of 0.5% for all 18 loci. As it is known that in rare cases females reach sexual maturity in their year of birth [25], we matched the genotypes of all individuals against the genotypes that can be produced by all possible pairs of males and females. We retrieved the combinations having two or less mismatches (out of 18 loci) and ensured that parental links were not circular and were temporally consistent. This way, we identified eight young females as mothers of animals born in the same year, with a known father but a mother not yet identified. All of these females were relatively heavy (>33 g) at the end of the season and their home-ranges matched those of their putative offspring. Finally, the pedigree was checked using a polymorphic Y-linked locus developed for this population [34], as well as a fragment of the mitochondrial DNA control region, amplified using vole specific primers [35]. There were no inconsistencies between the transmission of these three markers and the reconstructed pedigree. The final pedigree had a maximum depth of 11 generations and a mean of 3.8 generations. It consisted of 987 individuals with 458 full sibship, 3010 half sibship, 764 known maternities and 776 known paternities, so that, excluding the base population, 86% of the total parental links were recovered.

**Traits.** The recapture probability from one trapping session to the next was estimated to be 0.924 (SE 0.012) for adults and 0.814 (SE 0.030) for juveniles using mark-recapture models. Thus, with three trapping session a year, the probability not to trap an individual present in a given year is below  $10^{-3}$ . Not surprisingly, no animal was captured in year  $y$ , not captured in  $y + 1$ , but captured or found to be a parent of a



juvenile in  $y + 2$  or later. Therefore, capture data almost perfectly matches over-winter survival. However, as is almost always the case in these type of studies, we are unable to separate death from permanent emigration. Importantly however, as both have the same consequences on the population level, this does not affect our estimates of selection.

Annual and lifetime reproductive success (ARS and LRS, respectively) were defined as the number of offspring attributed to an individual in the pedigree, either over a specific year or over its lifetime. 56 individuals born of local parents were not captured in their first year, but only as adult during the next summer, probably because they were born late in the season and we had only few opportunities to catch them. This means that we miss a fraction of the juveniles that are not observed in their first year and die, or emigrate, during the following winter. We acknowledge that as a consequence our measures of ARS and LRS partly conflate adult reproductive success and the viability of those juveniles that were born late in the season, but our measures are the most complete measures of reproductive success available in this system.

We used relative LRS ( $\omega$ ) as proxy for fitness [22], where  $\omega_i = \frac{\text{LRS}_i}{\frac{1}{N_{s,t}} \sum_{j=1}^{N_{s,t}} \text{LRS}_{j,t}}$ . Here,  $N_{s,t}$  is the number of individuals of same sex as the focal individual  $i$ , present in the cohort  $t$ , so that  $\frac{1}{N_{s,t}} \sum_{j=1}^{N_{s,t}} \text{LRS}_{j,t}$  is the sex-specific, cohort-specific mean of LRS. The latter is required as the mean LRS differs between males and females due to imperfect sampling [11]. In addition, we used cohort-specific means in order to account for variations in population size.

Generation time was defined as the mean age of parents at birth of their offspring [36].

Mass ( $m$ ) was measured to the nearest gram with a spring scale. Both body length ( $b$ ), measured from the tip of the nose to the base of the tail, and tail length, measured from the tip to the base of the tail ( $c$ ), were measured to the closest mm with a calliper while holding the animal by the tail.

**Selection.** Selection differentials were estimated using bivariate linear mixed models, as the individual-level covariance between fitness and mass (corrected for sex, age and cohort). However, while this provides the best estimate of the change in trait mean due to selection [22], because the distribution of fitness is not Gaussian, it cannot be used to

estimate confidence intervals. Hence, the statistical significance of selection was tested using a univariate over-dispersed Poisson generalized linear mixed model (GLMM) in which LRS was modelled as a function of individual standardized mass (corrected for sex, age and cohort). Note that the latter estimates the effect of mass on a transformed scale, and therefore cannot be directly used to quantify an effect of selection on the original scale measured in grams [37]. The significance drawn on the basis of the GLMM was confirmed by non-parametric bootstrapping.

Similarly, we tested for the significance of selection through ARS only, using an over-dispersed Poisson GLMM including sex as a fixed effect, and year and individual as random effects. Here, modelling capture probability does not help to model survival because the year-to-year individual recapture probability is virtually 1. Therefore, selection on year-to-year survival was tested for by a binomial GLMM. This model included sex, age and their interaction as fixed effects, and year as a random effect.

**Quantitative genetic analyses.** We used uni- and multivariate animal models to estimate additive genetic variances, covariances and breeding values [18, 38, 39] with MCMCglmm [40]. All estimations were carried out in a Bayesian framework in order to propagate uncertainty when computing composite statistics such as heritabilities and rates of genetic change [14]. All estimates provided in the text are posterior modes and credibility intervals are highest probability density intervals at the level 95%. All the animal models were run for 1,300,000 iterations with a burnin of 300,000 and a thinning of 1,000, so that the autocorrelations of each parameter chain was less than 0.1. Convergence was checked graphically and by running each model twice.

**Univariate models:** We first carried out univariate model selection, fitting models without an additive genetic effect, to determine which fixed and random effects to include. Based on AICc [41], and fitting the models by Maximum of Likelihood in lme4 [42], we obtained a model that predicts the mass  $m_{i,t}$  of individual  $i$  at time  $t$  by: age, as a factor (juvenile or adult); sex as a factor; the interaction between age and sex; Julian dates and squared Julian dates, which were centered and divided by their standard errors in order to facilitate convergence; the interaction between age and Julian date; the interaction between sex and Julian date; the three way interaction

between age, sex and Julian dates; a random intercept for individual; and a random intercept for year. The inclusion of year accounts for non-independence of observation within years, while individual accounted for multiple measurements [43]. We then fitted an animal model by adding a random intercept modelling variance associated with mother identity [39], and a random intercept modelling additive genetic variance. Although it was not included in the best models, we kept inbreeding coefficient as a covariate, because leaving it out could bias the later estimation of additive genetic variation [44]. Nevertheless, animal models fitted without this covariate gave indistinguishable estimates.

**Multivariate models:** Univariate animal models can be expanded to multivariate models in order to estimate genetic correlations, genetic gradients and genetic differentials.

$$[\mathbf{m}, \mathbf{l}, \mathbf{t}, \boldsymbol{\omega}] \sim \mathbf{b}\mathbf{X} + \mathbf{D}_1\mathbf{a} + \mathbf{D}_2\mathbf{m} + \mathbf{D}_3\mathbf{p} + \mathbf{D}_4\mathbf{y} + \mathbf{I}\mathbf{r}.$$

Here  $\mathbf{X}$ ,  $\mathbf{D}_1$ ,  $\mathbf{D}_2$ ,  $\mathbf{D}_3$  and  $\mathbf{D}_4$  are design matrices relating observations to the parameters to estimate,  $\mathbf{b}$  is a matrix of fixed effects,  $\mathbf{a}$ ,  $\mathbf{m}$ ,  $\mathbf{p}$  and  $\mathbf{y}$  are random effects accounting for the variance associated with breeding value, mother, permanent environment and year, respectively. The fixed part of the model matches that used for each trait in univariate models.

The most important aspect of this model is that  $\mathbf{a}$ , the matrix of breeding values, follows a multivariate normal distribution:

$$\mathbf{a} \sim MVN(\mathbf{0}, \mathbf{A} \otimes \mathbf{G}) \quad (1)$$

where  $\mathbf{A}$  is the relatedness matrix between all individuals, and  $\mathbf{G}$  is the G-matrix, i.e. the additive genetic variance covariance matrix between all traits.

$$\mathbf{G} = \begin{pmatrix} \sigma_A^2(m) & \sigma_A(m, l) & \sigma_A(m, t) & \sigma_A(m, \omega) \\ \sigma_A(m, l) & \sigma_A^2(l) & \sigma_A(l, t) & \sigma_A(l, \omega) \\ \sigma_A(m, t) & \sigma_A(l, t) & \sigma_A^2(t) & \sigma_A(t, \omega) \\ \sigma_A(m, \omega) & \sigma_A(l, \omega) & \sigma_A(t, \omega) & \sigma_A^2(\omega) \end{pmatrix}. \quad (2)$$

For any trait  $z$ ,  $\sigma_A(z, \omega)$  is the genetic differential, that is, the rate of evolutionary change according to Price equation [11]. For mass, the genetic differential was also estimated using a bivariate animal model, of mass and fitness, in order to confirm the value of this crucial parameter. For two traits  $z$  and  $y$ , the genetic correlation is  $\frac{\sigma_A(z, y)}{\sigma_A(z)\sigma_A(y)}$ . The vector of selection differentials on the three traits ( $\mathbf{S}$ ) was estimated as the sum of the vectors of covariances between traits and  $\omega$  in the variance-covariance matrices for  $\mathbf{a}$ ,  $\mathbf{p}$  and  $\mathbf{r}$ ; which was equivalent to the selection differential computed in the paragraph on selection above. Let  $\mathbf{G}'$  be a subset of  $\mathbf{G}$  excluding the column and the row that contain  $\omega$ . The vector of selection gradients on the three traits ( $\beta$ ) was estimated as  $(\mathbf{G}' + \mathbf{P}' + \mathbf{R}')^{-1}\mathbf{S}$ , where  $\mathbf{P}'$  and  $\mathbf{R}'$  are the equivalent of  $\mathbf{G}'$  for permanent environment effects and for residuals, respectively.

The prediction of the multivariate breeders equation is obtained by  $\Delta\bar{\mathbf{Z}}' = \mathbf{G}'\beta$ , while the multivariate breeders equation ignoring genetic correlations is obtained by multiplying the  $\mathbf{G}'$  matrix by the identity matrix [23]:  $\Delta\bar{\mathbf{Z}}' = (\mathbf{G}' \times \mathbf{I})\beta$ .

**Test of genetic correlations:** We used ASRem1-R [45, 46] to test the genetic correlation between mass in adults and in juveniles against 1 and 0, by considering them as two separate traits. We first ran an unconstrained model and then reran it with the genetic correlation parameter set to 0.99 (and not exactly to 1 because ASRem1 cannot invert matrices with perfect correlations), or 0 respectively. The fit of the unconstrained model was then compared to that of the two constrained models using a likelihood ratio test with one degree of freedom [47].

**Birth date and growth prediction.** Using the Bayesian programming environment JAGS [48], we fitted a multivariate Bayesian model to mass measurements of the 613 juveniles with mass data, and to their overwinter survival. The model simultaneously estimated individual growth curves—that is birth dates, individual growth rates and

asymptotic masses of all juveniles—and the effect of asymptotic mass on overwinter survival. The model clustered juveniles from the same mother born in the same year into litters, using a mixture of birth dates depending on litter affiliations (see e.g. [49] for a similar approach), assuming a maximum of five litters per year and assuming that successive litters are at least 20 days apart [25]. The birth weight was assumed not to vary among individuals. Preliminary model selection assuming no differences in asymptotic masses among individuals selected a monomolecular growth model ( $\Delta\text{DIC} > 80$ ) over Gompertz and logistic models, as defined in [50]. The model accounted for measurement error in mass, assuming that the standard deviation of the errors was that observed in animals measured multiple time on the same day (2.05g). Within the model we performed a logistic regression of year-to-year survival on sex and asymptotic mass, in order to estimate the overall viability selection on asymptotic mass. We ran the full model again, adding time until the first snow fall and its interaction with asymptotic mass in the logistic regression, in order to test for the effect of the length of snow free period on the selection on asymptotic mass. We use the estimates of these two models to predict the survival probability as a function of asymptotic mass for every year, or for groups of years, depending on the distribution of birth dates and on the timing of the first snow fall. Three MCMC chains were run for 6,300,000 iterations, with a burnin of 300,000 and a thinning of 6,000. Convergence was assessed by visual examination of the traces, and by checking that the  $\hat{R} < 1.01$ . Convergence was not achieved for the litter affiliations of 25 individuals as well as for one asymptotic mass, thus generating a bit more uncertainty in the estimations. The fit of the model was assessed using posterior predictive checks on the predictions of individual masses ( $p=0.46$ ) and survival probabilities ( $p=0.49$ ). The JAGS code for this model can be found at <https://github.com/timotheenivalis/SelRepSel>.

## Acknowledgements

Thanks to the many field helpers. Thanks to Wolf U. Blanckenhorn, Jarrod D. Hadfield, Lukas F. Keller, Marc Kéry, Hanna Kokko, Chelsea J. Little, Pirmin Nietlisbach, Barbara Tschirren and Ashley E. Latimer for comments and discussions. Weather data were provided by MeteoSwiss. The snow vole monitoring was authorised by the *Amt für*

*Lebensmittelsicherheit und Tiergesundheit*, Chur, Switzerland. T.B. is funded by a Swiss  
National Science Foundation project grant (31003A\_141110) awarded to EP.

## References

1. Parmesan C. Ecological and evolutionary responses to recent climate change. *Annual Review of Ecology, Evolution, and Systematics*. 2006;p. 637–669.
2. Merilä J, Sheldon BC, Kruuk LEB. Explaining stasis: microevolutionary studies in natural populations. *Genetica*. 2001;112:199–222.
3. Charmantier A, Gienapp P. Climate change and timing of avian breeding and migration: evolutionary versus plastic changes. *Evolutionary Applications*. 2014;7(1):15–28.
4. Gienapp P, Brommer JE. Evolutionary dynamics in response to climate change. In: Charmentier A, Garant D, Kruuk LEB, editors. *Quantitative genetics in the wild*. Oxford: Oxford University Press, Oxford; 2014. p. 254–273.
5. Blanckenhorn W. The evolution of body size: what keeps organisms small? *Q Rev Biol*. 2000;75(4):385–407.
6. Mousseau TA, Roff DA. Natural selection and the heritability of fitness components. *Heredity*. 1987 Oct;59(2):181–197.
7. Postma E. Four decades of estimating heritabilities in wild vertebrate populations: improved methods, more data, better estimates? In: Charmentier A, Garant D, Kruuk LEB, editors. *Quantitative genetics in the wild*. 1st ed. Oxford: Oxford University Press; 2014. p. 16–33.
8. Heim NA, Knope ML, Schaal EK, Wang SC, Payne JL. Cope’s rule in the evolution of marine animals. *Science*. 2014;347(6224):867–870.
9. Baker J, Meade A, Pagel M, Venditti C. Adaptive evolution toward larger size in mammals. *Proc Natl Acad Sci USA*. 2015;112(16):5093–5098.

10. Gotanda KM, Correa C, Turcotte MM, Rolshausen G, Hendry AP. Linking macro-trends and micro-rates: re-evaluating micro-evolutionary support for Cope's rule. *Evolution*. 2015;69:1345–1354.
11. Morrissey MB, Parker DJ, Korsten P, Pemberton JM, Kruuk LEB, Wilson AJ. The prediction of adaptive evolution: empirical application of the secondary theorem of selection and comparison to the breeder's equation. *Evolution*. 2012;66(8):2399–2410.
12. Postma E. Implications of the difference between true and predicted breeding values for the study of natural selection and micro-evolution. *J Evol Biol*. 2006;19:309–320.
13. Hadfield JD, Wilson AJ, Garant D, Sheldon BC, Kruuk LEB. The misuse of BLUP in ecology and evolution. *Am Nat*. 2010 Jan;175(1):116–25.
14. Stinchcombe JR, Simonsen AK, Blows MW. Estimating uncertainty in multivariate responses to selection. *Evolution*. 2014 Apr;68(4):1188–96.
15. Pigeon G, Festa-Bianchet M, Coltman DW, Pelletier F. Intense selective hunting leads to artificial evolution in horn size. *Evolutionary Applications*. 2016 jan;p. in press.
16. García-Navas V, Bonnet T, Waldvogel D, Wandeler P, Camenisch G, Postma E. Gene flow counteracts the effect of drift in a Swiss population of snow voles fluctuating in size. *Biol Conserv*. 2015;191:168–177.
17. Bonnet T, Postma E. Successful by chance? the power of mixed models and neutral simulations for the detection of individual fixed heterogeneity in fitness components. *Am Nat*. 2016;187(1):60–74.
18. Lynch M, Walsh B. *Genetics and Analysis of Quantitative Traits*. Sinauer Associates; 1998.
19. Hadfield JD, Wilson AJ, Kruuk LEB. Cryptic evolution: does environmental deterioration have a genetic basis? *Genetics*. 2011 Apr;187(4):1099–113.

20. Robertson A. A mathematical model of the culling process in dairy cattle. *Animal Production*. 1966;8:95–108.
21. Price GR. Selection and covariance. *Nature*. 1970;227:520–21.
22. Lande R, Arnold SJ. The measurement of selection on correlated characters. *Evolution*. 1983;37(6):1210–1226.
23. Morrissey MB, Walling Ca, Wilson AJ, Pemberton JM, Clutton-Brock TH, Kruuk LEB. Genetic analysis of life-history constraint and evolution in a wild ungulate population. *Am Nat*. 2012;179(4):E97–E114.
24. Chevin LM. Evolution of adult size depends on genetic variance in growth trajectories: A comment on analyses of evolutionary dynamics using integral projection models. *Methods in Ecology and Evolution*. 2015;6:981–986.
25. Janeau G, Aulagnier S. Snow vole - *Chionomys nivalis* (Martins 1842). *IBEX Journal of Mountain Ecology*. 1997;4:1–11.
26. Hadfield JD. Estimating evolutionary parameters when viability selection is operating. *Proc R Soc London Ser B*. 2008 Mar;275(1635):723–34.
27. Steinsland I, Larsen CT, Roulin A, Jensen H. Quantitative genetic modeling and inference in the presence of nonignorable missing data. *Evolution*. 2014 Jun;68(6):1735–1747.
28. Stearns SC, Koella JC. The evolution of phenotypic plasticity in life-history traits: Predictions of reaction norms for age and size at maturity. *Evolution*. 1986;40(5):893–913.
29. Owens IPF, Wilson K. Immunocompetence: A neglected life history trait or conspicuous red herring? *Trends Ecol Evol*. 1999;14(5):170–172.
30. Wandeler P, Ravaioli R, Bucher TB. Microsatellite DNA markers for the snow vole (*Chionomys nivalis*). *Molecular Ecology Resources*. 2008;8:637–639.
31. Marshall T, Slate J, Kruuk LEB, Pemberton JM. Statistical confidence for likelihood-based paternity inference in natural populations. *Molecular Ecology*. 1998;7:639–655.



32. R Core Team. R: A Language and Environment for Statistical Computing. 433  
Vienna, Austria; 2014. Available from: <http://www.R-project.org/>. 434
33. Hadfield JD, Richardson DS, Burke T. Towards unbiased parentage assignment: 435  
combining genetic, behavioural and spatial data in a Bayesian framework. 436  
Molecular Ecology. 2006 1;15(12):3715–3730. 437
34. Wandeler P, Camenisch G. Identifying Y-chromosomal diversity by long-template 438  
PCR. Molecular Ecology Resources. 2011;11:835–841. 439
35. Haring E, Herzig-Straschil B, Spitzenberger F. Phylogenetic analysis of Alpine 440  
voles of the *Microtus multiplex* complex using the mitochondrial control region. 441  
Journal of Zoological Systematics and Evolutionary Research. 2000;38:231–238. 442
36. Charlesworth B. Models of age-structured populations. In: Evolution in 443  
Age-Structured Populations. 2nd ed. Cambridge: University of Cambridge Press; 444  
1994. p. 28–30. 445
37. Mitchell-Olds T, Shaw RG. Regression analysis of natural selection: statistical 446  
inference and biological interpretation. Evolution. 1987;41(6):1149–1161. 447
38. Henderson CR. Applications of Linear Models in Animal Breeding. Guelph: 448  
University of Guelph Press; 1984. 449
39. Kruuk LEB. Estimating genetic parameters in natural populations using the 450  
'animal model'. Philosophical transactions of the Royal Society of London Series 451  
B, Biological sciences. 2004;359(1446):873–90. 452
40. Hadfield JD. MCMC Methods for Multi-Response Generalized Linear Mixed 453  
Models: The MCMCglmm R Package. Journal of Statistical Software. 454  
2010;33(2):1–22. 455
41. Burnham KKP, Anderson DRD. Model Selection and Multimodel Inference: A 456  
Practical Information-Theoretic Approach (2nd ed). vol. 172. Springer-Verlag, 457  
Heidelberg; 2002. 458
42. Bates D, Mächler M, Bolker B, Walker S. Fitting Linear Mixed-Effects Models 459  
Using lme4. Journal of Statistical Software. 2015;67(1):1–48. 460

43. Kruuk LEB, Hadfield JD. How to separate genetic and environmental causes of  
similarity between relatives. *Journal of Evolutionary Biology*. 2007  
Sep;20(5):1890–903.
44. de Boer IJM, Hoeschele I. Genetic evaluation methods for populations with  
dominance and inbreeding. *Theoretical and Applied Genetics*. 1993;86:245–258.
45. Gilmour AR, Gogel BJ, Cullis BR, Welham SJ, Thompson R. ASReml User  
Guide Release 3.0. VSN International Ltd, Hemel Hempstead, UK; 2014.
46. Butler DG, Cullis BR, Gilmour AR, Gogel BJ. ASReml-R reference manual; 2009.  
Draft Copy.
47. Wilson AJ, Réale D, Clements MN, Morrissey MM, Postma E, Walling Ca, et al.  
An ecologist's guide to the animal model. *The Journal of animal ecology*. 2009  
Jan;79(1):13–26.
48. Plummer M. JAGS: A program for analysis of Bayesian graphical models using  
Gibbs sampling. In: *Proceedings of the 3rd International Workshop on  
Distributed Statistical Computing*; 2003. .
49. Cornulier T, Elston Da, Arcese P, Benton TG, Douglas DJT, Lambin X, et al.  
Estimating the annual number of breeding attempts from breeding dates using  
mixture models. *Ecology letters*. 2009 Nov;12(11):1184–93.
50. English S, Bateman AW, Clutton-Brock TH. Lifetime growth in wild meerkats:  
incorporating life history and environmental factors into a standard growth  
model. *Oecologia*. 2012 May;169(1):143–53.

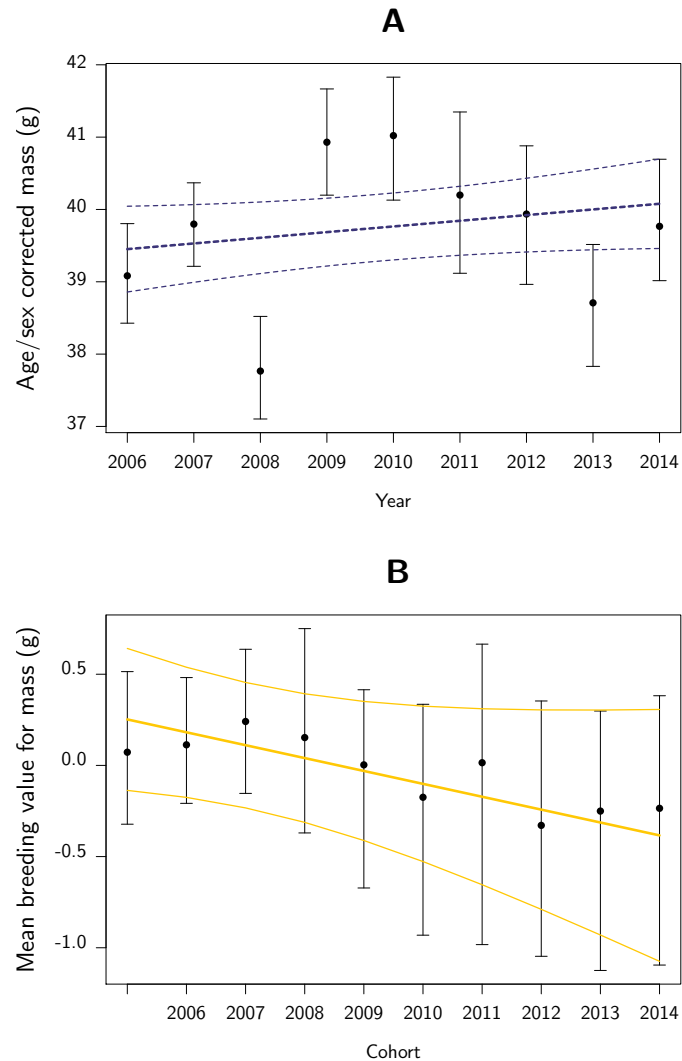

**Figure 1 Temporal variation in mass and estimated breeding values for mass. (A):** Year-specific mean mass corrected for age, sex and date of measurement, with 95%CI. **(B):** Cohort-specific mean estimated breeding value for mass with their 95%CI and the trend in breeding value with 95%CI.

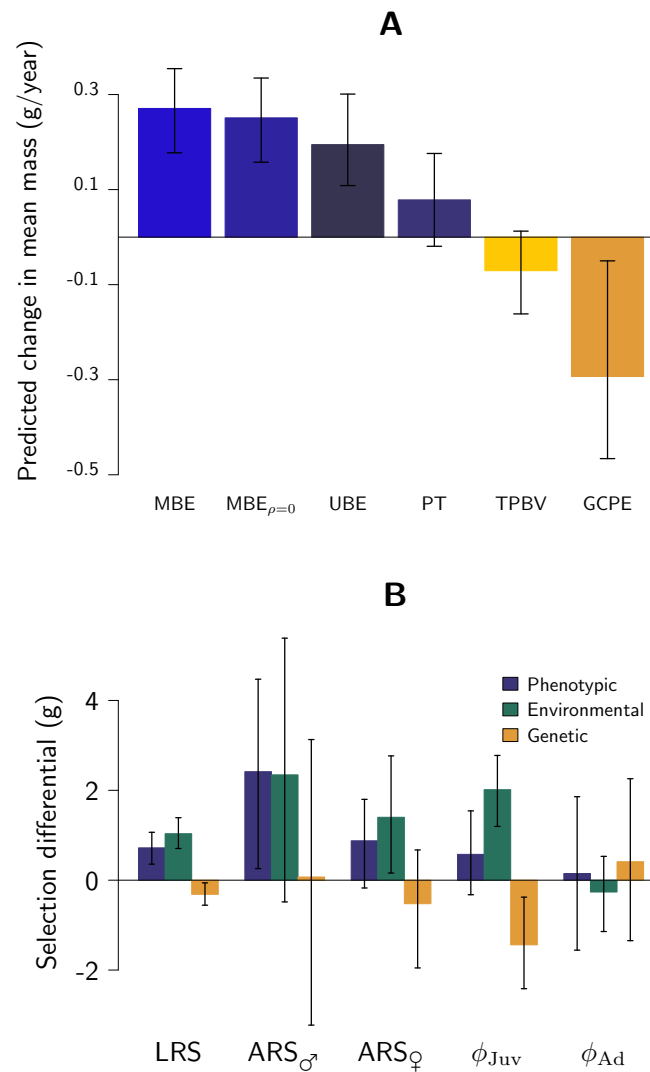

**Figure 2 Predicted and observed rates of evolutionary change.** (A): Rates of evolutionary change predicted by (from left to right) the breeder's equation in its multivariate form (MBE), the multivariate breeder's equation while constraining the genetic correlations to zero (MBE <sub>$\rho=0$</sub> ), and the univariate breeder's equation (UBE), followed by the phenotypic trend (PT), the trend in predicted breeding values (TPBV) and the genetic change estimated by the Price equation (GCPE). (B): Phenotypic, genetic and environmental selection differential for total selection (LRS), fertility selection in males (ARS <sub>$\sigma$</sub> ) and females (ARS <sub>$\phi$</sub> ), viability selection in juveniles ( $\phi_{Juv}$ ) and in adults ( $\phi_{Ad}$ ). Both panels show posterior modes, with vertical lines indicating 95%CI.

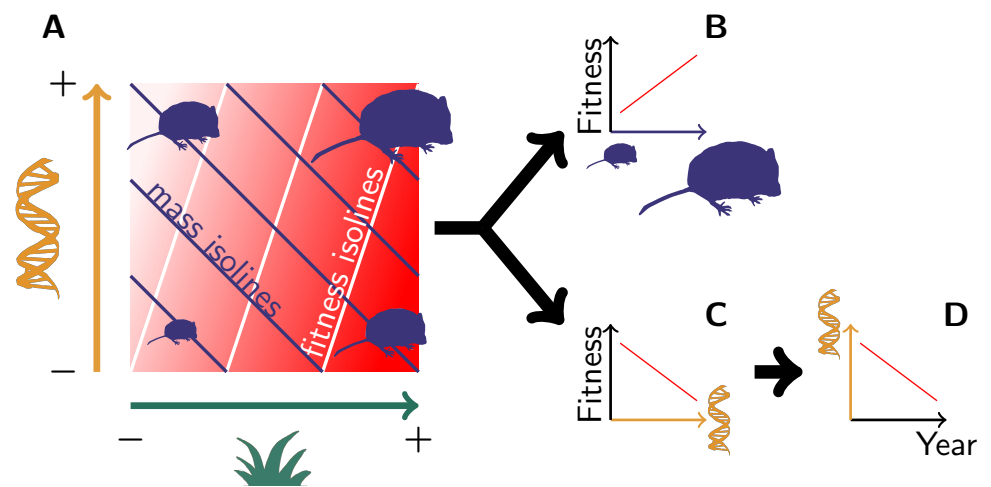

**Figure 3 Adaptive evolution goes opposite to selection.** (A) Both genetic variation (orange) and environmental variation (green) contribute to mass variation, but their respective effect on fitness (the redder the fitter) is not equivalent. This pattern leads to (B) a phenotypic selection for heavier voles, along with (C) a “genetic selection” for lighter genotypes, thus leading to (D) an evolution towards lighter voles.

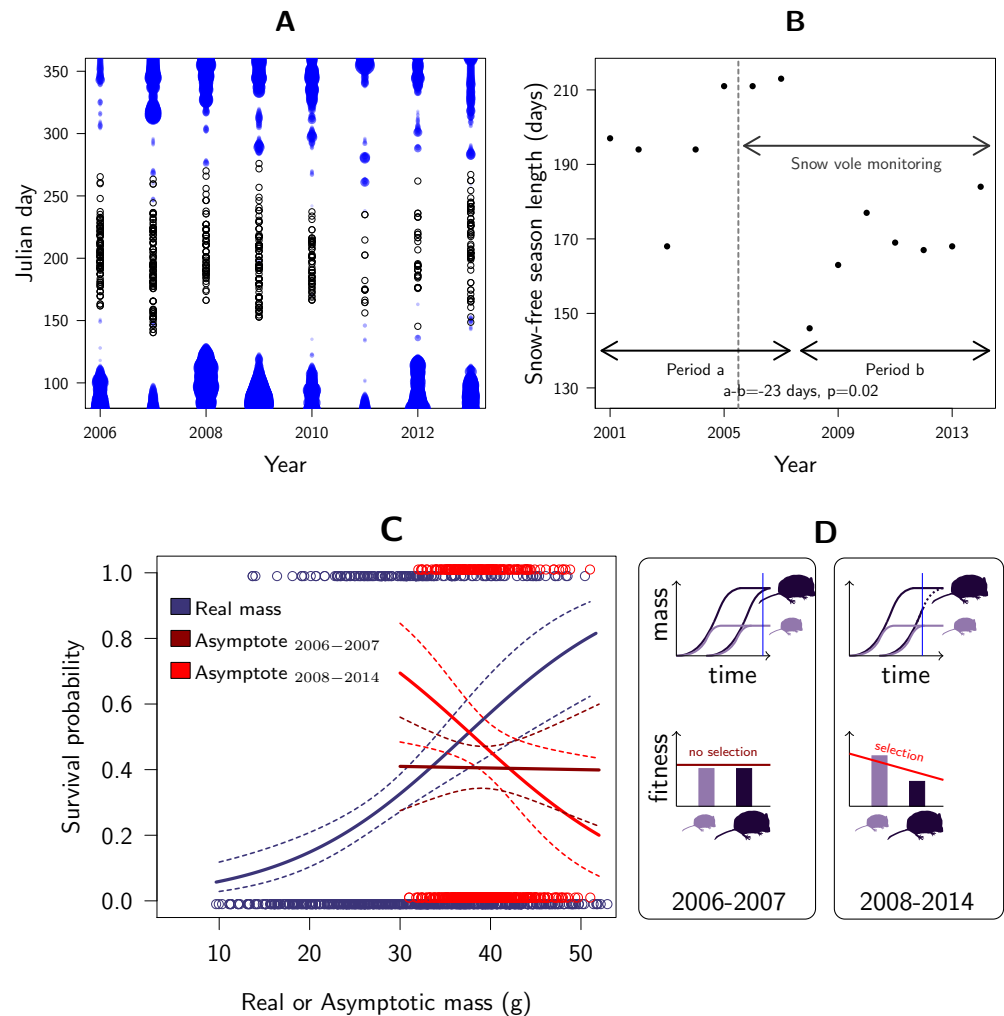

**Figure 4 Snow-free season, timing of reproduction and selection for asymptotic mass.** (A): Births (black dots) only occur during the snow free season (snow depth in blue), (B): which in 2008–2014 has been shorter than in the preceding 8 year. Therefore, (C) despite a positive phenotypic selection on body mass (blue), asymptotic mass was selectively neutral in 2006–2007 (brown), and was negatively selected in 2008–2014 (red), as a result of (D) the selective disappearance of heavy individuals that were born too close to the onset of winter (blue vertical line) during 2008–2014.
